# Supplementary material for: Capturing volatile organic compounds using Ag and Au nanoparticles: regium–π and C–H⋯Ag/Au interactions at work
Source: Royal Society of Chemistry journal article supplement (doi:10.1039/d3ta05616c), 2023-01-01
Supplement: d3ta05616c1.pdf [file d3ta05616c1.pdf]

## Electronic Supporting Information

### Capturing Volatile Organic Compounds using Ag and Au nanoparticles: Regium- $\pi$ and C-H $\cdots$ Ag/Au interactions at work.

María de las Nieves Piña,<sup>a</sup> Jeroni Morey,<sup>\*,a</sup> Antonio Frontera<sup>a</sup> and Antonio

Bauzá<sup>\*,a</sup>

<sup>a</sup>Department of Chemistry, Universitat de les Illes Balears, Crta. de Valldemossa km 7.5, 07122 Palma (Balears), SPAIN; Fax: (+) 34 971 173426; E-mail: [jeroni.morey@uib.es](mailto:jeroni.morey@uib.es), [antonio.bauza@uib.es](mailto:antonio.bauza@uib.es)

|                                                          |        |
|----------------------------------------------------------|--------|
| <b>Figure S1</b>                                         | page 2 |
| <b>Figure S2</b>                                         | page 2 |
| <b>Figure S3</b>                                         | page 3 |
| <b>Figure S4</b>                                         | page 3 |
| <b>Figure S5</b>                                         | page 4 |
| <b>Figure S6</b>                                         | page 5 |
| Cartesian coordinates of complexes <b>1</b> to <b>16</b> | page 6 |

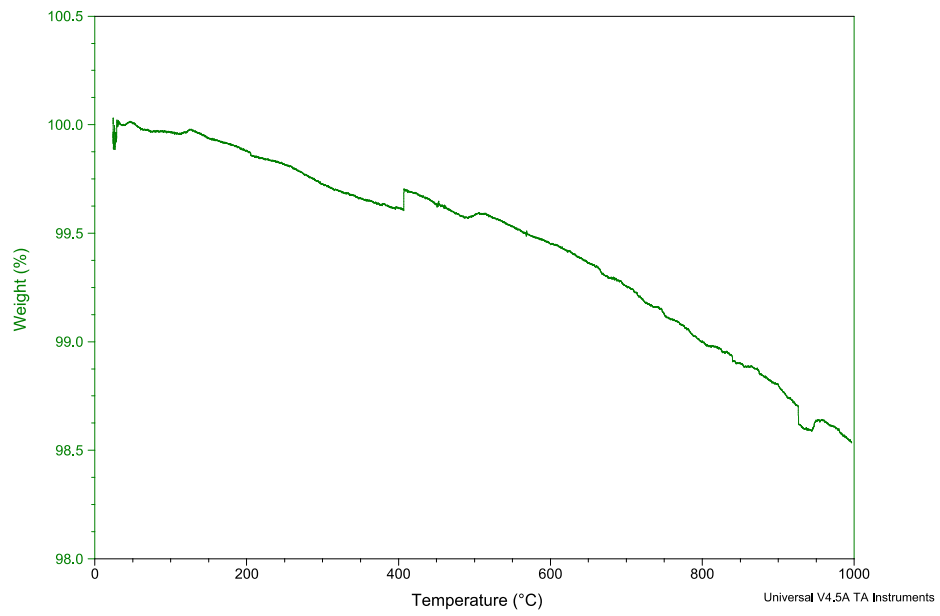

**Figure S1.** Thermogravimetric analysis (TGA) of Ag nanoparticles.

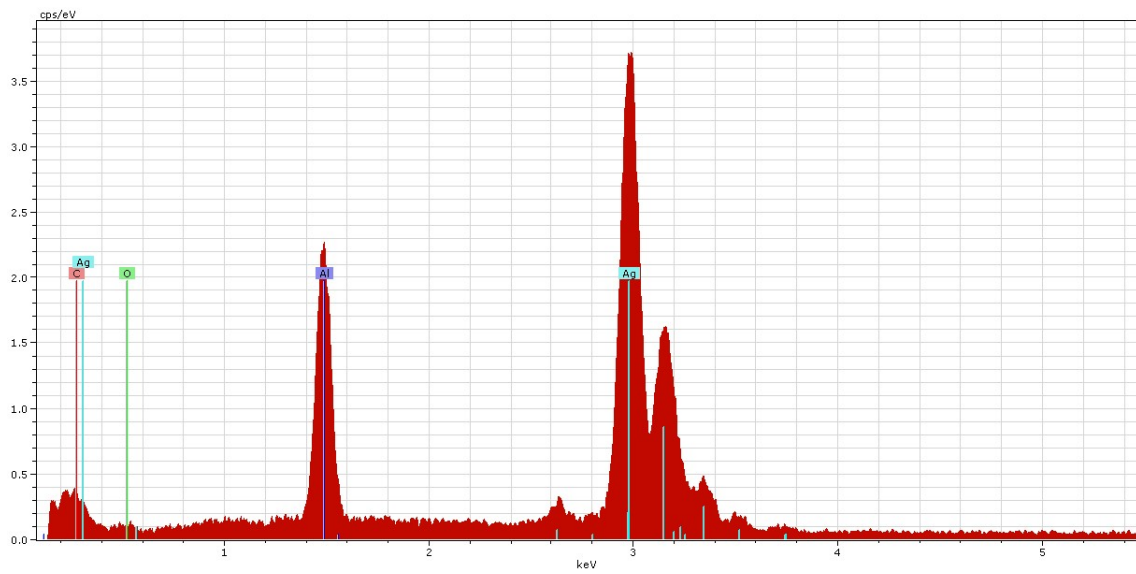

**Figure S2.** SEM-EDX of Ag nanoparticles.

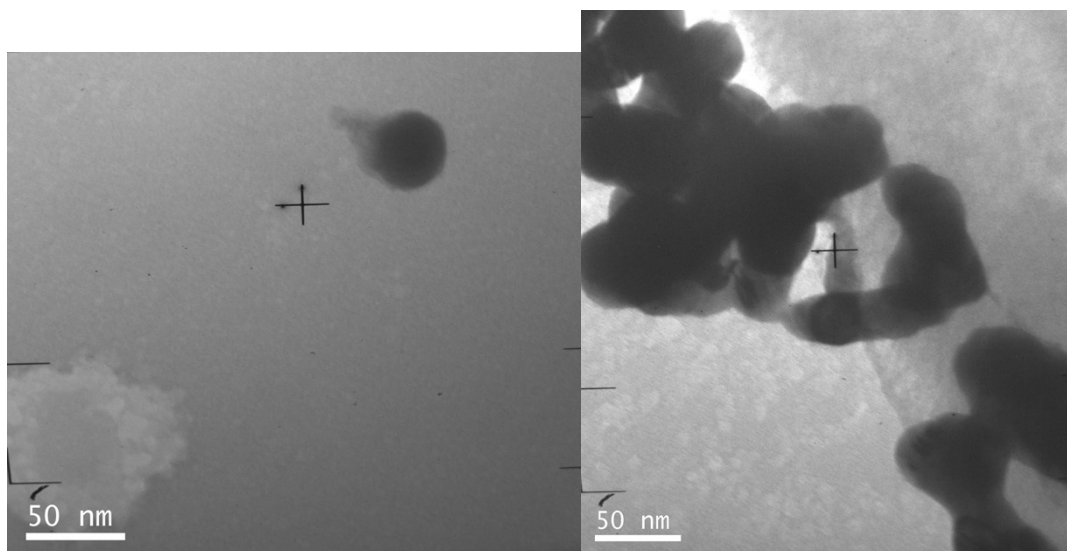

**Figure S3.** TEM micrographs of Ag nanoparticles.

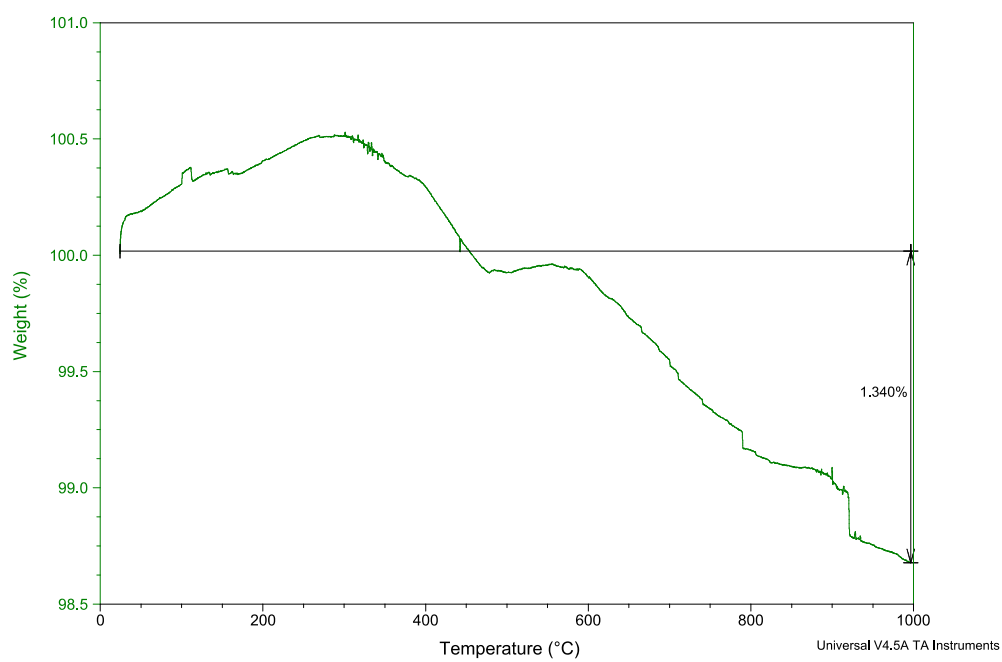

**Figure S4.** Thermogravimetric analysis (TGA) of Au nanoparticles.

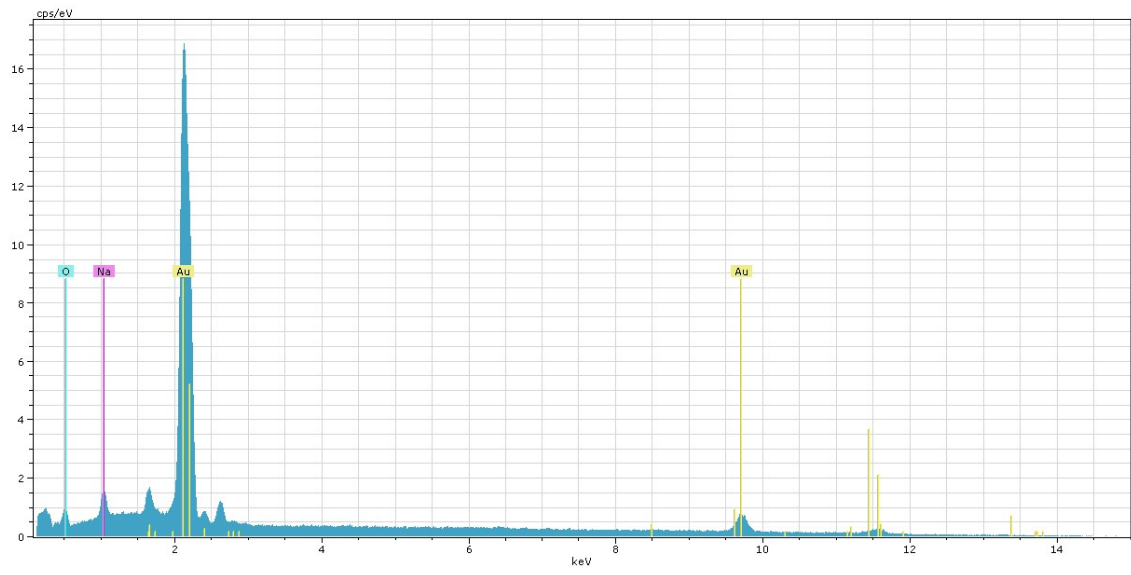

**Figure S5.** SEM-EDX of Au nanoparticles.

### Sample Details

### AuNPs Size aver

Record Number: 4 File Name: JeroniPrueba.dts  
Temperature (°C): 25.0 Meas Date & Time: Tuesday, November 23, 2021 12:14:56 PM  
Derived Count Rate (kcps... 345.7 Solvent: Water  
Intercept: 0.806 Measurement quality: **Good**

### Hydrodynamic Radius

Z-Average (± SD) (r.nm): 87.68 ± 56.92

Polydispersity Index: 0.421

Estimated MW (± SD) (KDa): 1.18e5 ± 7.68e+04

%Polydispersity: 64.9

Sample Polydispersity: Polydisperse

### Distribution Results

|         | Mode ± SD (nm) | %Pd  | Est. MW (KDa)<br>(Mean ± SD)* | % Intensity | % Mass | Peak<br>Polydispersity |
|---------|----------------|------|-------------------------------|-------------|--------|------------------------|
| Peak 1: | 82.09 ± 34.23  | 37.3 | 1.32e+5 ± 4.91e+4             | 98.0        | 64.8   | Polydisperse           |
| Peak 2: | 2780 ± 156.7   | 5.8  | 3.59e+8 ± 2.08e+7             | 2.0         | 35.2   | Monodisperse           |
| Peak 3: | 0.000 ± 0.000  | 0    | 0.0 ± 0.0                     | 0.0         | 0.0    |                        |

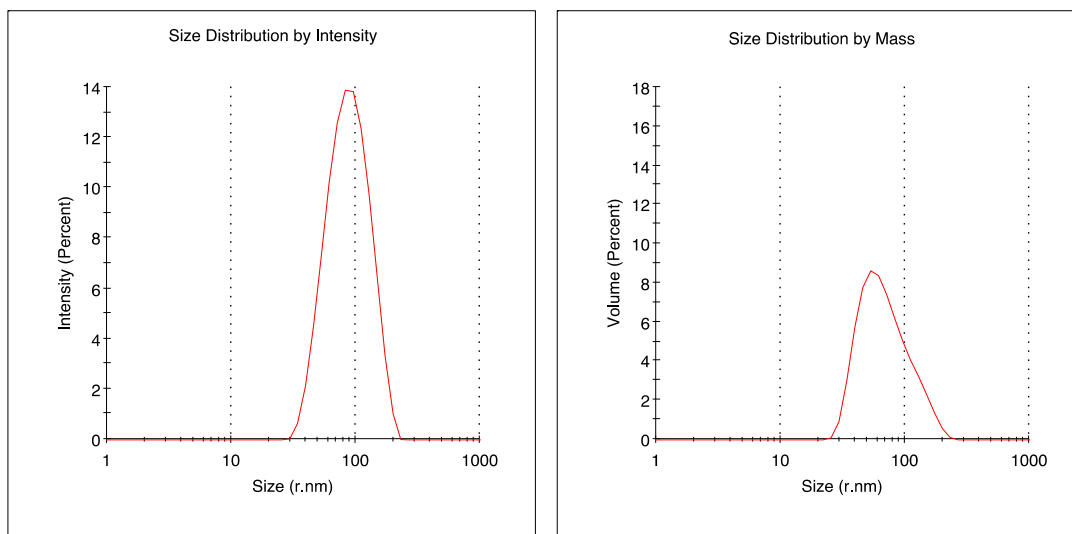

Figure S6. DLS of Au nanoparticles.

## Cartesian Coordinates of Complexes 1 to 16

### 1. Benzene@Ag<sub>26</sub>

|    |            |            |            |
|----|------------|------------|------------|
| Ag | -8.2577035 | 2.7791402  | 4.9619427  |
| Ag | -5.8450899 | 3.5630459  | 3.4900353  |
| Ag | -6.7666262 | 0.7268483  | 3.4900353  |
| Ag | -3.4936040 | 4.3270898  | 2.0257809  |
| Ag | -5.3133281 | -1.2734449 | 2.0257809  |
| Ag | -4.3478903 | 1.5087648  | 2.1233220  |
| Ag | -1.1007463 | 5.1045765  | 0.5683060  |
| Ag | -3.8344607 | -3.3089313 | 0.5683060  |
| Ag | -2.8947447 | -0.5115848 | 0.6248074  |
| Ag | -1.9847392 | 2.2891243  | 0.6248074  |
| Ag | 1.3204794  | 5.8912804  | -0.8272902 |
| Ag | -2.3380609 | -5.3685489 | -0.8272902 |
| Ag | -1.4058719 | -2.5688605 | -0.8138478 |
| Ag | -0.4979226 | 0.2578344  | -0.8374952 |
| Ag | 0.4290207  | 3.0783580  | -0.8138478 |
| Ag | 3.7193835  | 6.6707316  | -2.2724729 |
| Ag | -0.8554567 | -7.4091787 | -2.2724729 |
| Ag | 0.1014382  | -4.6065212 | -2.1450832 |
| Ag | 0.9953692  | -1.7805537 | -2.1899282 |
| Ag | 1.9083103  | 1.0291903  | -2.1899282 |
| Ag | 2.8461670  | 3.8408855  | -2.1450832 |
| Ag | 1.3282218  | -6.4838182 | -3.8920761 |
| Ag | 2.2438372  | -3.7219348 | -3.8920761 |
| Ag | 3.1717438  | -0.9345124 | -3.8920761 |
| Ag | 4.0594573  | 1.8659693  | -3.8920761 |
| Ag | 4.9421033  | 4.6385653  | -3.8920761 |
| C  | 0.8101121  | -1.5871438 | 1.9131578  |
| C  | 1.7700609  | -2.1686804 | 1.0819971  |
| C  | 2.7838619  | -1.3823478 | 0.5270771  |
| C  | 2.8338033  | -0.0135571 | 0.8014617  |

|   |           |            |            |
|---|-----------|------------|------------|
| C | 1.8723206 | 0.5687529  | 1.6318012  |
| C | 0.8623468 | -0.2185941 | 2.1888115  |
| H | 0.0184809 | -2.2035592 | 2.3471048  |
| H | 1.7303104 | -3.2390845 | 0.8663585  |
| H | 3.5376557 | -1.8371439 | -0.1204005 |
| H | 3.6291785 | 0.6009322  | 0.3712507  |
| H | 1.9100536 | 1.6401706  | 1.8447178  |
| H | 0.1116273 | 0.2374497  | 2.8383355  |

## 2. Toluene@Ag26

|    |            |            |            |
|----|------------|------------|------------|
| Ag | -8.2159718 | 2.7361579  | 4.6969403  |
| Ag | -5.8033596 | 3.5200632  | 3.2250337  |
| Ag | -6.7248954 | 0.6838672  | 3.2250337  |
| Ag | -3.4518750 | 4.2841068  | 1.7607801  |
| Ag | -5.2715981 | -1.3164248 | 1.7607801  |
| Ag | -4.3061608 | 1.4657833  | 1.8583212  |
| Ag | -1.0590186 | 5.0615930  | 0.3033059  |
| Ag | -3.7927315 | -3.3519101 | 0.3033059  |
| Ag | -2.8530160 | -0.5545652 | 0.3598074  |
| Ag | -1.9430111 | 2.2461424  | 0.3598074  |
| Ag | 1.3622057  | 5.8482964  | -1.0922894 |
| Ag | -2.2963326 | -5.4115267 | -1.0922894 |
| Ag | -1.3641441 | -2.6118398 | -1.0788470 |
| Ag | -0.4561953 | 0.2148536  | -1.1024945 |
| Ag | 0.4707475  | 3.0353756  | -1.0788470 |
| Ag | 3.7611084  | 6.6277472  | -2.5374714 |
| Ag | -0.8137292 | -7.4521552 | -2.5374714 |
| Ag | 0.1431651  | -4.6494993 | -2.4100816 |
| Ag | 1.0370957  | -1.8235334 | -2.4549266 |
| Ag | 1.9500363  | 0.9862089  | -2.4549266 |
| Ag | 2.8878924  | 3.7979026  | -2.4100816 |
| Ag | 1.3699481  | -6.5267953 | -4.1570737 |
| Ag | 2.2855630  | -3.7649134 | -4.1570737 |
| Ag | 3.2134691  | -0.9774925 | -4.1570737 |

|    |            |            |            |
|----|------------|------------|------------|
| Ag | 4.1011820  | 1.8229876  | -4.1570737 |
| Ag | 4.9838276  | 4.5955820  | -4.1570737 |
| C  | 0.8435434  | -1.6341507 | 1.6670652  |
| C  | 1.7702261  | -2.1999079 | 0.7892404  |
| C  | 2.7764392  | -1.4124211 | 0.2262287  |
| C  | 2.8337565  | -0.0519359 | 0.5366521  |
| C  | 1.9034710  | 0.5088585  | 1.4136306  |
| C  | 0.9030119  | -0.2751695 | 2.0060871  |
| H  | 0.0681593  | -2.2647976 | 2.1119152  |
| H  | 1.7106781  | -3.2646301 | 0.5504203  |
| H  | 3.5161396  | -1.8556609 | -0.4445938 |
| H  | 3.6178284  | 0.5762773  | 0.1056307  |
| H  | 1.9665265  | 1.5738201  | 1.6557427  |
| C  | -0.0816950 | 0.3290796  | 2.9612990  |
| H  | 0.3844365  | 1.1034328  | 3.5877263  |
| H  | -0.9112922 | 0.8119128  | 2.4125122  |
| H  | -0.5303424 | -0.4288762 | 3.6189855  |

### 3. *o*-Xylene@Ag26

|    |            |            |            |
|----|------------|------------|------------|
| Ag | -8.3496468 | 2.5836660  | 4.5583090  |
| Ag | -5.9370364 | 3.3675707  | 3.0864037  |
| Ag | -6.8585717 | 0.5313771  | 3.0864037  |
| Ag | -3.5855540 | 4.1316137  | 1.6221514  |
| Ag | -5.4052756 | -1.4689134 | 1.6221514  |
| Ag | -4.4398390 | 1.3132926  | 1.7196923  |
| Ag | -1.1926997 | 4.9090991  | 0.1646785  |
| Ag | -3.9264102 | -3.5043969 | 0.1646785  |
| Ag | -2.9866956 | -0.7070543 | 0.2211798  |
| Ag | -2.0766911 | 2.0936508  | 0.2211798  |
| Ag | 1.2285227  | 5.6958019  | -1.2309157 |
| Ag | -2.4300124 | -5.5640117 | -1.2309157 |
| Ag | -1.4978249 | -2.7643272 | -1.2174734 |
| Ag | -0.5898766 | 0.0623638  | -1.2411208 |
| Ag | 0.3370652  | 2.8828835  | -1.2174734 |



|                         |            |            |            |
|-------------------------|------------|------------|------------|
| Ag                      | 3.6274235  | 6.4752520  | -2.6760965 |
| Ag                      | -0.9474102 | -7.6046384 | -2.6760965 |
| Ag                      | 0.0094832  | -4.8019849 | -2.5487070 |
| Ag                      | 0.9034130  | -1.9760214 | -2.5935519 |
| Ag                      | 1.8163529  | 0.8337185  | -2.5935519 |
| Ag                      | 2.7542080  | 3.6454098  | -2.5487070 |
| Ag                      | 1.2362651  | -6.6792794 | -4.2956975 |
| Ag                      | 2.1518793  | -3.9173998 | -4.2956975 |
| Ag                      | 3.0797844  | -1.1299813 | -4.2956975 |
| Ag                      | 3.9674969  | 1.6704966  | -4.2956975 |
| Ag                      | 4.8501414  | 4.4430886  | -4.2956975 |
| C                       | 0.6819460  | -1.8237143 | 1.4904132  |
| C                       | 1.6169220  | -2.3850190 | 0.6192215  |
| C                       | 2.6314899  | -1.5870861 | 0.0919879  |
| C                       | 2.6936176  | -0.2363978 | 0.4394649  |
| C                       | 1.7689803  | 0.3361206  | 1.3222240  |
| C                       | 0.7455068  | -0.4747152 | 1.8609567  |
| H                       | -0.1124970 | -2.4504772 | 1.9063271  |
| H                       | 1.5522703  | -3.4436111 | 0.3571959  |
| H                       | 3.3782170  | -2.0123703 | -0.5826973 |
| H                       | 3.4920587  | 0.3896282  | 0.0302110  |
| C                       | -0.2464409 | 0.0983716  | 2.8272223  |
| H                       | 0.2504173  | 0.5157387  | 3.7179556  |
| H                       | -0.8206214 | 0.9249150  | 2.3720189  |
| H                       | -0.9701787 | -0.6579695 | 3.1606987  |
| C                       | 1.8808698  | 1.7800304  | 1.7112808  |
| H                       | 0.9309394  | 2.3190395  | 1.5547917  |
| H                       | 2.1274542  | 1.8887628  | 2.7807415  |
| H                       | 2.6566401  | 2.2951497  | 1.1279501  |
| <b>4. m-Xylene@Ag26</b> |            |            |            |
| Ag                      | -8.5048983 | 2.6510200  | 4.6704976  |
| Ag                      | -6.0922833 | 3.4349262  | 3.1985894  |
| Ag                      | -7.0138202 | 0.5987270  | 3.1985894  |

|    |            |            |            |
|----|------------|------------|------------|
| Ag | -3.7407962 | 4.1989706  | 1.7343342  |
| Ag | -5.5605213 | -1.4015673 | 1.7343342  |
| Ag | -4.5950829 | 1.3806440  | 1.8318753  |
| Ag | -1.3479371 | 4.9764577  | 0.2768584  |
| Ag | -4.0816531 | -3.4370549 | 0.2768584  |
| Ag | -3.1419365 | -0.6397068 | 0.3333599  |
| Ag | -2.2319305 | 2.1610039  | 0.3333599  |
| Ag | 1.0732900  | 5.7631620  | -1.1187385 |
| Ag | -2.5852524 | -5.4966737 | -1.1187385 |
| Ag | -1.6530629 | -2.6969837 | -1.1052961 |
| Ag | -0.7451130 | 0.1297128  | -1.1289436 |
| Ag | 0.1818307  | 2.9502380  | -1.1052961 |
| Ag | 3.4721954  | 6.5426136  | -2.5639221 |
| Ag | -1.1026473 | -7.5373045 | -2.5639221 |
| Ag | -0.1457520 | -4.7346455 | -2.4365323 |
| Ag | 0.7481796  | -1.9086764 | -2.4813773 |
| Ag | 1.6611212  | 0.9010691  | -2.4813773 |
| Ag | 2.5989784  | 3.7127659  | -2.4365323 |
| Ag | 1.0810324  | -6.6119436 | -4.1835262 |
| Ag | 1.9966483  | -3.8500586 | -4.1835262 |
| Ag | 2.9245554  | -1.0626346 | -4.1835262 |
| Ag | 3.8122694  | 1.7378487  | -4.1835262 |
| Ag | 4.6949159  | 4.5104462  | -4.1835262 |
| C  | 0.4400445  | -1.6635009 | 1.6365725  |
| C  | 1.3876164  | -2.2184380 | 0.7749808  |
| C  | 2.4420272  | -1.4433825 | 0.2905428  |
| C  | 2.5584310  | -0.0957900 | 0.6581621  |
| C  | 1.5868392  | 0.4465885  | 1.5112788  |
| C  | 0.5344889  | -0.3209346 | 2.0274875  |
| H  | -0.3724530 | -2.2851397 | 2.0240526  |
| H  | 1.3084597  | -3.2693146 | 0.4855895  |
| H  | 3.1915792  | -1.8916625 | -0.3678167 |
| H  | 1.6703064  | 1.4982376  | 1.8045385  |

|   |            |            |            |
|---|------------|------------|------------|
| C | -0.4675677 | 0.2836487  | 2.9649582  |
| H | -0.0104355 | 1.0441071  | 3.6144565  |
| H | -1.2798464 | 0.7823940  | 2.4042166  |
| H | -0.9417337 | -0.4782412 | 3.5998057  |
| C | 3.7279046  | 0.7302242  | 0.2075652  |
| H | 3.4478654  | 1.7862158  | 0.0736753  |
| H | 4.5392605  | 0.6931942  | 0.9537402  |
| H | 4.1400617  | 0.3645565  | -0.7450365 |

### 5. *p*-Xylene@Ag26

|    |            |            |            |
|----|------------|------------|------------|
| Ag | -8.5184745 | 2.8961445  | 4.7557510  |
| Ag | -6.1058615 | 3.6800500  | 3.2838440  |
| Ag | -7.0273976 | 0.8438532  | 3.2838440  |
| Ag | -3.7543763 | 4.4440938  | 1.8195900  |
| Ag | -5.5740999 | -1.1564393 | 1.8195900  |
| Ag | -4.6086624 | 1.6257696  | 1.9171311  |
| Ag | -1.3615193 | 5.2215803  | 0.3621154  |
| Ag | -4.0952329 | -3.1919253 | 0.3621154  |
| Ag | -3.1555172 | -0.3945795 | 0.4186169  |
| Ag | -2.2455119 | 2.4061289  | 0.4186169  |
| Ag | 1.0597057  | 6.0082840  | -1.0334803 |
| Ag | -2.5988335 | -5.2515424 | -1.0334803 |
| Ag | -1.6666448 | -2.4518547 | -1.0200379 |
| Ag | -0.7586957 | 0.3748394  | -1.0436854 |
| Ag | 0.1682473  | 3.1953622  | -1.0200379 |
| Ag | 3.4586092  | 6.7877348  | -2.4786627 |
| Ag | -1.1162297 | -7.2921714 | -2.4786627 |
| Ag | -0.1593351 | -4.4895148 | -2.3512729 |
| Ag | 0.7345956  | -1.6635481 | -2.3961179 |
| Ag | 1.6475365  | 1.1461951  | -2.3961179 |
| Ag | 2.5853929  | 3.9578895  | -2.3512729 |
| Ag | 1.0674481  | -6.3668113 | -4.0982653 |
| Ag | 1.9830634  | -3.6049285 | -4.0982653 |
| Ag | 2.9109696  | -0.8175069 | -4.0982653 |

|    |            |            |            |
|----|------------|------------|------------|
| Ag | 3.7986829  | 1.9829740  | -4.0982653 |
| Ag | 4.6813286  | 4.7555691  | -4.0982653 |
| C  | 0.5520787  | -1.4695377 | 1.7071810  |
| C  | 1.5120451  | -2.0491111 | 0.8767659  |
| C  | 2.5555765  | -1.2890291 | 0.3309249  |
| C  | 2.5657352  | 0.0850328  | 0.6063661  |
| C  | 1.6036233  | 0.6651594  | 1.4343914  |
| C  | 0.5933723  | -0.1058206 | 2.0249589  |
| H  | -0.2359997 | -2.0973735 | 2.1337418  |
| H  | 1.4600353  | -3.1204882 | 0.6635094  |
| H  | 3.3567903  | 0.7123986  | 0.1844553  |
| H  | 1.6542446  | 1.7383582  | 1.6420372  |
| C  | -0.4056874 | 0.5076455  | 2.9592400  |
| H  | 0.0543238  | 1.2839922  | 3.5878913  |
| H  | -1.2292233 | 0.9898738  | 2.4006799  |
| H  | -0.8632759 | -0.2465861 | 3.6153513  |
| C  | 3.6497883  | -1.9330007 | -0.4708210 |
| H  | 4.4531148  | -2.3005142 | 0.1895684  |
| H  | 3.2758719  | -2.7946552 | -1.0457315 |
| H  | 4.0979535  | -1.2235105 | -1.1817158 |

**6. 1,2,3-Trimethylbenzene@Ag26**

|    |            |            |            |
|----|------------|------------|------------|
| Ag | -8.6226506 | 2.5160551  | 4.5550624  |
| Ag | -6.2100356 | 3.2999613  | 3.0831542  |
| Ag | -7.1315725 | 0.4637621  | 3.0831542  |
| Ag | -3.8585485 | 4.0640057  | 1.6188990  |
| Ag | -5.6782736 | -1.5365322 | 1.6188990  |
| Ag | -4.7128352 | 1.2456791  | 1.7164401  |
| Ag | -1.4656894 | 4.8414928  | 0.1614232  |
| Ag | -4.1994054 | -3.5720198 | 0.1614232  |
| Ag | -3.2596888 | -0.7746717 | 0.2179247  |
| Ag | -2.3496828 | 2.0260390  | 0.2179247  |
| Ag | 0.9555377  | 5.6281971  | -1.2341737 |
| Ag | -2.7030047 | -5.6316386 | -1.2341737 |

|    |            |            |            |
|----|------------|------------|------------|
| Ag | -1.7708152 | -2.8319486 | -1.2207313 |
| Ag | -0.8628653 | -0.0052521 | -1.2443788 |
| Ag | 0.0640784  | 2.8152731  | -1.2207313 |
| Ag | 3.3544431  | 6.4076487  | -2.6793573 |
| Ag | -1.2203996 | -7.6722694 | -2.6793573 |
| Ag | -0.2635043 | -4.8696104 | -2.5519675 |
| Ag | 0.6304273  | -2.0436413 | -2.5968125 |
| Ag | 1.5433689  | 0.7661042  | -2.5968125 |
| Ag | 2.4812261  | 3.5778010  | -2.5519675 |
| Ag | 0.9632801  | -6.7469085 | -4.2989614 |
| Ag | 1.8788960  | -3.9850235 | -4.2989614 |
| Ag | 2.8068031  | -1.1975995 | -4.2989614 |
| Ag | 3.6945171  | 1.6028838  | -4.2989614 |
| Ag | 4.5771636  | 4.3754813  | -4.2989614 |
| C  | 0.3404680  | -1.8358435 | 1.4311430  |
| C  | 1.3051293  | -2.4007315 | 0.5988542  |
| C  | 2.3730109  | -1.6229359 | 0.1577096  |
| C  | 2.4912689  | -0.2777368 | 0.5332898  |
| C  | 1.5001856  | 0.2988167  | 1.3588155  |
| C  | 0.4286224  | -0.4951780 | 1.8252632  |
| H  | -0.4886169 | -2.4481747 | 1.7978328  |
| H  | 1.2315635  | -3.4506072 | 0.3056596  |
| H  | 3.1450558  | -2.0683217 | -0.4755676 |
| C  | -0.5917294 | 0.0752933  | 2.7655084  |
| H  | -0.1276349 | 0.4256051  | 3.7017668  |
| H  | -1.1112252 | 0.9466106  | 2.3292670  |
| H  | -1.3605980 | -0.6671796 | 3.0213744  |
| C  | 1.5983659  | 1.7324511  | 1.7964536  |
| H  | 0.6174497  | 2.2314761  | 1.7710953  |
| H  | 1.9654025  | 1.8089080  | 2.8348607  |
| H  | 2.2761753  | 2.3184913  | 1.1634225  |
| C  | 3.6945806  | 0.5068232  | 0.0922809  |
| H  | 3.4138354  | 1.4127911  | -0.4726083 |

|   |           |            |            |
|---|-----------|------------|------------|
| H | 4.2948291 | 0.8402014  | 0.9540906  |
| H | 4.3412351 | -0.0967162 | -0.5589659 |

**7. 1,3,5-Trifluorobenzene@Ag26**

|    |            |            |            |
|----|------------|------------|------------|
| Ag | -8.1970272 | 2.7611173  | 4.9132608  |
| Ag | -5.7844163 | 3.5450222  | 3.4413551  |
| Ag | -6.7059516 | 0.7088278  | 3.4413551  |
| Ag | -3.4329332 | 4.3090654  | 1.9771024  |
| Ag | -5.2526551 | -1.2914630 | 1.9771024  |
| Ag | -4.2872184 | 1.4907436  | 2.0746433  |
| Ag | -1.0400780 | 5.0865512  | 0.5196290  |
| Ag | -3.7737896 | -3.3269471 | 0.5196290  |
| Ag | -2.8340744 | -0.5296038 | 0.5761304  |
| Ag | -1.9240701 | 2.2711022  | 0.5761304  |
| Ag | 1.3811449  | 5.8732542  | -0.8759655 |
| Ag | -2.2773914 | -5.3865627 | -0.8759655 |
| Ag | -1.3452033 | -2.5868773 | -0.8625232 |
| Ag | -0.4372550 | 0.2398145  | -0.8861706 |
| Ag | 0.4896870  | 3.0603350  | -0.8625232 |
| Ag | 3.7800462  | 6.6527044  | -2.3211467 |
| Ag | -0.7947887 | -7.4271899 | -2.3211467 |
| Ag | 0.1621049  | -4.6245357 | -2.1937571 |
| Ag | 1.0560351  | -1.7985714 | -2.2386020 |
| Ag | 1.9689751  | 1.0111693  | -2.2386020 |
| Ag | 2.9068308  | 3.8228615  | -2.1937571 |
| Ag | 1.3888873  | -6.5018306 | -3.9407481 |
| Ag | 2.3045016  | -3.7399502 | -3.9407481 |
| Ag | 3.2324073  | -0.9525309 | -3.9407481 |
| Ag | 4.1201197  | 1.8479477  | -3.9407481 |
| Ag | 5.0027648  | 4.6205404  | -3.9407481 |
| C  | 0.6399146  | -1.5467492 | 1.9827920  |
| C  | 1.6590614  | -2.1089307 | 1.2209490  |
| C  | 2.7051687  | -1.3577741 | 0.6942959  |
| C  | 2.7159894  | 0.0042818  | 0.9751156  |

|   |            |            |           |
|---|------------|------------|-----------|
| C | 1.7268830  | 0.6250899  | 1.7311907 |
| C | 0.7037300  | -0.1782617 | 2.2238025 |
| H | -0.1753400 | -2.1549589 | 2.3752395 |
| H | 3.4880466  | -1.8172622 | 0.0912523 |
| H | 1.7528023  | 1.6972310  | 1.9249455 |
| F | -0.2695093 | 0.3902387  | 2.9272696 |
| F | 3.6976026  | 0.7479030  | 0.4774308 |
| F | 1.6202725  | -3.4119476 | 0.9692254 |

#### 8. Hexafluorobenzene@Ag26

|    |            |            |            |
|----|------------|------------|------------|
| Ag | -8.0506230 | 2.5568396  | 4.7662591  |
| Ag | -5.6380080 | 3.3407458  | 3.2943509  |
| Ag | -6.5595449 | 0.5045466  | 3.2943509  |
| Ag | -3.2865209 | 4.1047902  | 1.8300957  |
| Ag | -5.1062460 | -1.4957477 | 1.8300957  |
| Ag | -4.1408076 | 1.2864636  | 1.9276368  |
| Ag | -0.8936618 | 4.8822773  | 0.3726199  |
| Ag | -3.6273778 | -3.5312353 | 0.3726199  |
| Ag | -2.6876612 | -0.7338872 | 0.4291214  |
| Ag | -1.7776552 | 2.0668235  | 0.4291214  |
| Ag | 1.5275653  | 5.6689816  | -1.0229770 |
| Ag | -2.1309771 | -5.5908541 | -1.0229770 |
| Ag | -1.1987876 | -2.7911641 | -1.0095346 |
| Ag | -0.2908377 | 0.0355324  | -1.0331821 |
| Ag | 0.6361060  | 2.8560576  | -1.0095346 |
| Ag | 3.9264707  | 6.4484332  | -2.4681606 |
| Ag | -0.6483720 | -7.6314849 | -2.4681606 |
| Ag | 0.3085233  | -4.8288259 | -2.3407708 |
| Ag | 1.2024549  | -2.0028568 | -2.3856158 |
| Ag | 2.1153965  | 0.8068887  | -2.3856158 |
| Ag | 3.0532537  | 3.6185855  | -2.3407708 |
| Ag | 1.5353077  | -6.7061240 | -4.0877647 |
| Ag | 2.4509236  | -3.9442390 | -4.0877647 |
| Ag | 3.3788307  | -1.1568150 | -4.0877647 |

|    |            |            |            |
|----|------------|------------|------------|
| Ag | 4.2665447  | 1.6436683  | -4.0877647 |
| Ag | 5.1491912  | 4.4162658  | -4.0877647 |
| C  | 0.4156077  | -1.2115423 | 2.2583135  |
| C  | 1.4585849  | -1.6722735 | 1.4561909  |
| C  | 2.4251154  | -0.7811780 | 0.9915998  |
| C  | 2.3522545  | 0.5686582  | 1.3336755  |
| C  | 1.3072527  | 1.0285118  | 2.1344886  |
| C  | 0.3382711  | 0.1384206  | 2.5951586  |
| F  | -0.6726162 | 0.5796609  | 3.3196139  |
| F  | 1.2197906  | 2.3115301  | 2.4302359  |
| F  | 3.2552311  | 1.4146548  | 0.8778823  |
| F  | 3.3916019  | -1.2095799 | 0.2016527  |
| F  | 1.5137781  | -2.9443162 | 1.1132394  |
| F  | -0.5195427 | -2.0475337 | 2.6680565  |

### 9. Benzene@Au26

|    |            |            |            |
|----|------------|------------|------------|
| Au | -8.2119654 | 2.7398584  | 4.9583477  |
| Au | -5.7993549 | 3.5237631  | 3.4864423  |
| Au | -6.7208901 | 0.6875694  | 3.4864423  |
| Au | -3.4478724 | 4.2878059  | 2.0221900  |
| Au | -5.2675940 | -1.3127209 | 2.0221900  |
| Au | -4.3021577 | 1.4694849  | 2.1197310  |
| Au | -1.0550182 | 5.0652915  | 0.5647171  |
| Au | -3.7887286 | -3.3482044 | 0.5647171  |
| Au | -2.8490141 | -0.5508619 | 0.6212185  |
| Au | -1.9390097 | 2.2498433  | 0.6212185  |
| Au | 1.3662041  | 5.8519944  | -0.8308771 |
| Au | -2.2923309 | -5.4078192 | -0.8308771 |
| Au | -1.3601433 | -2.6081347 | -0.8174347 |
| Au | -0.4521951 | 0.2185562  | -0.8410821 |
| Au | 0.4747468  | 3.0390759  | -0.8174347 |
| Au | 3.7651050  | 6.6314444  | -2.2760578 |
| Au | -0.8097287 | -7.4484461 | -2.2760578 |
| Au | 0.1471647  | -4.6457926 | -2.1486682 |



|    |            |            |            |
|----|------------|------------|------------|
| Au | 1.0410943  | -1.8198290 | -2.1935132 |
| Au | 1.9540343  | 0.9899110  | -2.1935132 |
| Au | 2.8918896  | 3.8016023  | -2.1486682 |
| Au | 1.3739465  | -6.5230869 | -3.8956586 |
| Au | 2.2895607  | -3.7612073 | -3.8956586 |
| Au | 3.2174659  | -0.9737889 | -3.8956586 |
| Au | 4.1051783  | 1.8266889  | -3.8956586 |
| Au | 4.9878229  | 4.5992809  | -3.8956586 |
| C  | 0.6864266  | -1.5001409 | 1.8783110  |
| C  | 1.6762438  | -2.0816177 | 1.0811475  |
| C  | 2.7137709  | -1.2959547 | 0.5696219  |
| C  | 2.7582443  | 0.0717872  | 0.8535069  |
| C  | 1.7674835  | 0.6530192  | 1.6511036  |
| C  | 0.7331862  | -0.1332275 | 2.1633949  |
| H  | -0.1277255 | -2.1130692 | 2.2730164  |
| H  | 1.6369131  | -3.1498991 | 0.8546230  |
| H  | 3.4906062  | -1.7507417 | -0.0501718 |
| H  | 3.5706561  | 0.6875006  | 0.4591637  |
| H  | 1.8014475  | 1.7228789  | 1.8713391  |
| H  | -0.0460126 | 0.3228600  | 2.7782977  |

#### 10. Toluene@Au26

|    |            |            |            |
|----|------------|------------|------------|
| Au | -7.8901982 | 2.5648460  | 4.4967150  |
| Au | -5.4775860 | 3.3487513  | 3.0248084  |
| Au | -6.3991218 | 0.5125553  | 3.0248084  |
| Au | -3.1261014 | 4.1127949  | 1.5605548  |
| Au | -4.9458245 | -1.4877367 | 1.5605548  |
| Au | -3.9803872 | 1.2944714  | 1.6580959  |
| Au | -0.7332450 | 4.8902811  | 0.1030806  |
| Au | -3.4669579 | -3.5232220 | 0.1030806  |
| Au | -2.5272424 | -0.7258771 | 0.1595821  |
| Au | -1.6172375 | 2.0748305  | 0.1595821  |
| Au | 1.6879793  | 5.6769845  | -1.2925147 |
| Au | -1.9705590 | -5.5828386 | -1.2925147 |

|                          |            |            |            |
|--------------------------|------------|------------|------------|
| Au                       | -1.0383705 | -2.7831517 | -1.2790723 |
| Au                       | -0.1304217 | 0.0435417  | -1.3027198 |
| Au                       | 0.7965211  | 2.8640637  | -1.2790723 |
| Au                       | 4.0868820  | 6.4564353  | -2.7376967 |
| Au                       | -0.4879556 | -7.6234671 | -2.7376967 |
| Au                       | 0.4689387  | -4.8208112 | -2.6103069 |
| Au                       | 1.3628693  | -1.9948453 | -2.6551519 |
| Au                       | 2.2758099  | 0.8148970  | -2.6551519 |
| Au                       | 3.2136660  | 3.6265907  | -2.6103069 |
| Au                       | 1.6957217  | -6.6981072 | -4.3572990 |
| Au                       | 2.6113366  | -3.9362253 | -4.3572990 |
| Au                       | 3.5392427  | -1.1488044 | -4.3572990 |
| Au                       | 4.4269556  | 1.6516757  | -4.3572990 |
| Au                       | 5.3096012  | 4.4242701  | -4.3572990 |
| C                        | 0.4554605  | -1.4162575 | 1.8503913  |
| C                        | 1.5185413  | -1.7174259 | 0.9948065  |
| C                        | 2.4031165  | -0.7134122 | 0.5925830  |
| C                        | 2.2067113  | 0.5941480  | 1.0450421  |
| C                        | 1.1425301  | 0.8886923  | 1.9012981  |
| C                        | 0.2565257  | -0.1121420 | 2.3276679  |
| H                        | -0.2329107 | -2.2104106 | 2.1528709  |
| H                        | 1.6530300  | -2.7406750 | 0.6353543  |
| H                        | 3.2366351  | -0.9473848 | -0.0743249 |
| H                        | 2.8837331  | 1.3903496  | 0.7252700  |
| H                        | 0.9988053  | 1.9169427  | 2.2454575  |
| C                        | -0.8532166 | 0.1978561  | 3.2891884  |
| H                        | -0.5072151 | 0.0895449  | 4.3305804  |
| H                        | -1.2162944 | 1.2302917  | 3.1698054  |
| H                        | -1.7098539 | -0.4795369 | 3.1531729  |
| <b>11. o-Xylene@Au26</b> |            |            |            |
| Au                       | -8.2654385 | 2.5981965  | 4.5446282  |
| Au                       | -5.8528370 | 3.3820984  | 3.0727284  |
| Au                       | -6.7743688 | 0.5459152  | 3.0727284  |

|    |            |            |            |
|----|------------|------------|------------|
| Au | -3.5013631 | 4.1461385  | 1.6084814  |
| Au | -5.3210782 | -1.4543680 | 1.6084814  |
| Au | -4.3556450 | 1.3278277  | 1.7060218  |
| Au | -1.1085175 | 4.9236212  | 0.1510138  |
| Au | -3.8422181 | -3.4898440 | 0.1510138  |
| Au | -2.9025069 | -0.6925117 | 0.2075150  |
| Au | -1.9925058 | 2.1081832  | 0.2075150  |
| Au | 1.3126960  | 5.7103211  | -1.2445753 |
| Au | -2.3458258 | -5.5494514 | -1.2445753 |
| Au | -1.4136418 | -2.7497772 | -1.2311330 |
| Au | -0.5056967 | 0.0769037  | -1.2547804 |
| Au | 0.4212418  | 2.8974131  | -1.2311330 |
| Au | 3.7115880  | 6.4897685  | -2.6897509 |
| Au | -0.8632290 | -7.5900707 | -2.6897509 |
| Au | 0.0936609  | -4.7874275 | -2.5623619 |
| Au | 0.9875875  | -1.9614742 | -2.6072065 |
| Au | 1.9005240  | 0.8482554  | -2.6072065 |
| Au | 2.8383758  | 3.6599365  | -2.5623619 |
| Au | 1.3204384  | -6.6647151 | -4.3093462 |
| Au | 2.2360492  | -3.9028455 | -4.3093462 |
| Au | 3.1639510  | -1.1154372 | -4.3093462 |
| Au | 4.0516602  | 1.6850304  | -4.3093462 |
| Au | 4.9343015  | 4.4576124  | -4.3093462 |
| C  | 0.6198553  | -1.8665920 | 1.4304753  |
| C  | 1.6012899  | -2.3596952 | 0.5671135  |
| C  | 2.5980163  | -1.5037501 | 0.0982455  |
| C  | 2.5963416  | -0.1646464 | 0.4961656  |
| C  | 1.6263450  | 0.3387379  | 1.3742131  |
| C  | 0.6208437  | -0.5307951 | 1.8535632  |
| H  | -0.1609316 | -2.5389269 | 1.7977931  |
| H  | 1.5840349  | -3.4089041 | 0.2624952  |
| H  | 3.3800703  | -1.8737807 | -0.5692413 |
| H  | 3.3796397  | 0.5074165  | 0.1329696  |

|   |            |            |           |
|---|------------|------------|-----------|
| C | -0.4160577 | -0.0367587 | 2.8155704 |
| H | 0.0418691  | 0.3181528  | 3.7530827 |
| H | -0.9787511 | 0.8171213  | 2.3991285 |
| H | -1.1457534 | -0.8199320 | 3.0628421 |
| C | 1.6746813  | 1.7687111  | 1.8229466 |
| H | 0.7048275  | 2.2735168  | 1.6817029 |
| H | 1.9118014  | 1.8417800  | 2.8975776 |
| H | 2.4315655  | 2.3388437  | 1.2666782 |

## 12. *m*-Xylene@Au26

|    |            |            |            |
|----|------------|------------|------------|
| Au | -8.2695838 | 2.4726990  | 4.5260075  |
| Au | -5.8569688 | 3.2566052  | 3.0540993  |
| Au | -6.7785057 | 0.4204060  | 3.0540993  |
| Au | -3.5054817 | 4.0206496  | 1.5898441  |
| Au | -5.3252068 | -1.5798883 | 1.5898441  |
| Au | -4.3597684 | 1.2023230  | 1.6873852  |
| Au | -1.1126226 | 4.7981367  | 0.1323683  |
| Au | -3.8463386 | -3.6153759 | 0.1323683  |
| Au | -2.9066220 | -0.8180278 | 0.1888698  |
| Au | -1.9966160 | 1.9826829  | 0.1888698  |
| Au | 1.3086045  | 5.5848410  | -1.2632286 |
| Au | -2.3499379 | -5.6749947 | -1.2632286 |
| Au | -1.4177484 | -2.8753047 | -1.2497862 |
| Au | -0.5097985 | -0.0486082 | -1.2734337 |
| Au | 0.4171452  | 2.7719170  | -1.2497862 |
| Au | 3.7075099  | 6.3642926  | -2.7084122 |
| Au | -0.8673328 | -7.7156255 | -2.7084122 |
| Au | 0.0895625  | -4.9129665 | -2.5810224 |
| Au | 0.9834941  | -2.0869974 | -2.6258674 |
| Au | 1.8964357  | 0.7227481  | -2.6258674 |
| Au | 2.8342929  | 3.5344449  | -2.5810224 |
| Au | 1.3163469  | -6.7902646 | -4.3280163 |
| Au | 2.2319628  | -4.0283796 | -4.3280163 |
| Au | 3.1598699  | -1.2409556 | -4.3280163 |

|    |            |            |            |
|----|------------|------------|------------|
| Au | 4.0475839  | 1.5595277  | -4.3280163 |
| Au | 4.9302304  | 4.3321252  | -4.3280163 |
| C  | 0.3142364  | -1.5600431 | 1.6544978  |
| C  | 1.3879083  | -1.8746938 | 0.8181592  |
| C  | 2.3245659  | -0.8985431 | 0.4725439  |
| C  | 2.1962544  | 0.4125432  | 0.9560971  |
| C  | 1.0987739  | 0.7114691  | 1.7784432  |
| C  | 0.1607913  | -0.2593137 | 2.1556250  |
| H  | -0.4111182 | -2.3336997 | 1.9216123  |
| H  | 1.4936444  | -2.8911470 | 0.4305715  |
| H  | 3.1675121  | -1.1584672 | -0.1737052 |
| H  | 0.9827703  | 1.7342875  | 2.1508174  |
| C  | -0.9527849 | 0.0762241  | 3.1044833  |
| H  | -0.6133144 | -0.0224341 | 4.1490077  |
| H  | -1.3060408 | 1.1105313  | 2.9716891  |
| H  | -1.8160147 | -0.5937110 | 2.9739913  |
| C  | 3.2371001  | 1.4515948  | 0.6579448  |
| H  | 2.8026403  | 2.4613778  | 0.6057797  |
| H  | 4.0068678  | 1.4614537  | 1.4479349  |
| H  | 3.7460514  | 1.2565760  | -0.2980282 |

### 13. *p*-Xylene@Au26

|    |            |            |            |
|----|------------|------------|------------|
| Au | -8.2603263 | 2.6441027  | 4.5666563  |
| Au | -5.8477133 | 3.4280081  | 3.0947493  |
| Au | -6.7692494 | 0.5918114  | 3.0947493  |
| Au | -3.4962281 | 4.1920519  | 1.6304953  |
| Au | -5.3159517 | -1.4084812 | 1.6304953  |
| Au | -4.3505142 | 1.3737278  | 1.7280364  |
| Au | -1.1033711 | 4.9695385  | 0.1730207  |
| Au | -3.8370847 | -3.4439672 | 0.1730207  |
| Au | -2.8973690 | -0.6466214 | 0.2295222  |
| Au | -1.9873637 | 2.1540871  | 0.2295222  |
| Au | 1.3178539  | 5.7562421  | -1.2225750 |
| Au | -2.3406853 | -5.5035843 | -1.2225750 |

|    |            |            |            |
|----|------------|------------|------------|
| Au | -1.4084966 | -2.7038966 | -1.2091326 |
| Au | -0.5005475 | 0.1227975  | -1.2327801 |
| Au | 0.4263955  | 2.9433203  | -1.2091326 |
| Au | 3.7167574  | 6.5356930  | -2.6677574 |
| Au | -0.8580815 | -7.5442133 | -2.6677574 |
| Au | 0.0988131  | -4.7415566 | -2.5403676 |
| Au | 0.9927438  | -1.9155900 | -2.5852126 |
| Au | 1.9056847  | 0.8941532  | -2.5852126 |
| Au | 2.8435411  | 3.7058476  | -2.5403676 |
| Au | 1.3255963  | -6.6188531 | -4.2873600 |
| Au | 2.2412116  | -3.8569703 | -4.2873600 |
| Au | 3.1691178  | -1.0695488 | -4.2873600 |
| Au | 4.0568311  | 1.7309322  | -4.2873600 |
| Au | 4.9394768  | 4.5035273  | -4.2873600 |
| C  | 0.2641928  | -1.2834828 | 1.8270430  |
| C  | 1.3462604  | -1.6440663 | 1.0207965  |
| C  | 2.3010652  | -0.6988674 | 0.6178974  |
| C  | 2.0939156  | 0.6325464  | 1.0060668  |
| C  | 1.0106368  | 0.9930491  | 1.8112915  |
| C  | 0.0891455  | 0.0377554  | 2.2619313  |
| H  | -0.4544025 | -2.0504149 | 2.1307483  |
| H  | 1.4554777  | -2.6859702 | 0.7060750  |
| H  | 2.7983358  | 1.4035861  | 0.6805692  |
| H  | 0.8867117  | 2.0401295  | 2.1024697  |
| C  | -1.0181765 | 0.4067676  | 3.2053629  |
| H  | -0.6950181 | 0.2792045  | 4.2521412  |
| H  | -1.3262608 | 1.4568379  | 3.0841845  |
| H  | -1.9077264 | -0.2248990 | 3.0584037  |
| C  | 3.5243410  | -1.1061429 | -0.1507663 |
| H  | 4.3353353  | -1.3932472 | 0.5389919  |
| H  | 3.3280968  | -1.9698391 | -0.8042398 |
| H  | 3.9038376  | -0.2866276 | -0.7795718 |

**14. 1,2,3-Trimethylbenzene@Au26**

|    |            |            |            |
|----|------------|------------|------------|
| Au | -8.5932249 | 2.5066497  | 4.5673202  |
| Au | -6.1806127 | 3.2905551  | 3.0954136  |
| Au | -7.1021486 | 0.4543591  | 3.0954136  |
| Au | -3.8291283 | 4.0545987  | 1.6311601  |
| Au | -5.6488513 | -1.5459330 | 1.6311601  |
| Au | -4.6834139 | 1.2362752  | 1.7287011  |
| Au | -1.4362718 | 4.8320848  | 0.1736859  |
| Au | -4.1699848 | -3.5814184 | 0.1736859  |
| Au | -3.2302692 | -0.7840734 | 0.2301873  |
| Au | -2.3202643 | 2.0166342  | 0.2301873  |
| Au | 0.9849526  | 5.6187883  | -1.2219094 |
| Au | -2.6735858 | -5.6410348 | -1.2219094 |
| Au | -1.7413973 | -2.8413480 | -1.2084671 |
| Au | -0.8334484 | -0.0146547 | -1.2321145 |
| Au | 0.0934942  | 2.8058673  | -1.2084671 |
| Au | 3.3838552  | 6.3982389  | -2.6670914 |
| Au | -1.1909823 | -7.6816632 | -2.6670914 |
| Au | -0.2340881 | -4.8790074 | -2.5397017 |
| Au | 0.6598426  | -2.0530415 | -2.5845467 |
| Au | 1.5727831  | 0.7567008  | -2.5845467 |
| Au | 2.5106392  | 3.5683944  | -2.5397017 |
| Au | 0.9926950  | -6.7563035 | -4.2866936 |
| Au | 1.9083098  | -3.9944215 | -4.2866936 |
| Au | 2.8362159  | -1.2070007 | -4.2866936 |
| Au | 3.7239289  | 1.5934795  | -4.2866936 |
| Au | 4.6065744  | 4.3660739  | -4.2866936 |
| C  | 0.3139640  | -1.8309900 | 1.3959287  |
| C  | 1.2835824  | -2.3824486 | 0.5585268  |
| C  | 2.3432412  | -1.5914052 | 0.1196682  |
| C  | 2.4504418  | -0.2468853 | 0.5056490  |
| C  | 1.4542612  | 0.3152341  | 1.3380026  |
| C  | 0.3901155  | -0.4921781 | 1.7998501  |
| H  | -0.5082206 | -2.4531408 | 1.7600010  |

|   |            |            |            |
|---|------------|------------|------------|
| H | 1.2194843  | -3.4314684 | 0.2602229  |
| H | 3.1187442  | -2.0259315 | -0.5170500 |
| C | -0.6314318 | 0.0569435  | 2.7499179  |
| H | -0.1653312 | 0.4060654  | 3.6851112  |
| H | -1.1655552 | 0.9237989  | 2.3222105  |
| H | -1.3889088 | -0.6973852 | 3.0030096  |
| C | 1.5495413  | 1.7429873  | 1.7933022  |
| H | 0.5641349  | 2.2319828  | 1.8027804  |
| H | 1.9465255  | 1.8041620  | 2.8216241  |
| H | 2.2045032  | 2.3446503  | 1.1506468  |
| C | 3.6573569  | 0.5434943  | 0.0853821  |
| H | 3.3864563  | 1.4844623  | -0.4225992 |
| H | 4.2755127  | 0.8169636  | 0.9563124  |
| H | 4.2843735  | -0.0333949 | -0.6083603 |

**15. 1,3,5-Trifluorobenzene@Au26**

|    |            |            |            |
|----|------------|------------|------------|
| Au | -8.1105694 | 2.6793594  | 4.8596043  |
| Au | -5.6979655 | 3.4632618  | 3.3877034  |
| Au | -6.6194983 | 0.6270761  | 3.3877034  |
| Au | -3.3464900 | 4.2273024  | 1.9234552  |
| Au | -5.1662063 | -1.3732085 | 1.9234552  |
| Au | -4.2007726 | 1.4089893  | 2.0209956  |
| Au | -0.9536423 | 5.0047859  | 0.4659862  |
| Au | -3.6873453 | -3.4086861 | 0.4659862  |
| Au | -2.7476331 | -0.6113515 | 0.5224876  |
| Au | -1.8376313 | 2.1893457  | 0.5224876  |
| Au | 1.4675734  | 5.7914867  | -0.9296039 |
| Au | -2.1909515 | -5.4682955 | -0.9296039 |
| Au | -1.2587666 | -2.6686186 | -0.9161616 |
| Au | -0.3508207 | 0.1580645  | -0.9398090 |
| Au | 0.5761181  | 2.9785762  | -0.9161616 |
| Au | 3.8664674  | 6.5709346  | -2.3747807 |
| Au | -0.7083533 | -7.5089167 | -2.3747807 |
| Au | 0.2485371  | -4.7062709 | -2.2473917 |



|    |            |            |            |
|----|------------|------------|------------|
| Au | 1.1424644  | -1.8803153 | -2.2922361 |
| Au | 2.0554018  | 0.9294168  | -2.2922361 |
| Au | 2.9932544  | 3.7411004  | -2.2473917 |
| Au | 1.4753158  | -6.5835599 | -3.9943774 |
| Au | 2.3909272  | -3.8216880 | -3.9943774 |
| Au | 3.3188298  | -1.0342775 | -3.9943774 |
| Au | 4.2065398  | 1.7661923  | -3.9943774 |
| Au | 5.0891819  | 4.5387766  | -3.9943774 |
| C  | 0.4922182  | -1.4520572 | 2.0414402  |
| C  | 1.5509926  | -1.9178809 | 1.2671510  |
| C  | 2.5606861  | -1.0845287 | 0.7953494  |
| C  | 2.4874420  | 0.2623329  | 1.1374778  |
| C  | 1.4542479  | 0.7879772  | 1.9080345  |
| C  | 0.4744683  | -0.0956318 | 2.3491521  |
| H  | -0.2914818 | -2.1236977 | 2.3921384  |
| H  | 3.3777233  | -1.4712803 | 0.1862509  |
| H  | 1.4151556  | 1.8489833  | 2.1542001  |
| F  | -0.5338138 | 0.3796117  | 3.0712979  |
| F  | 3.4326745  | 1.0829276  | 0.6968436  |
| F  | 1.5901390  | -3.2064275 | 0.9533149  |

**16. Hexafluorobenzene@Au26**

|    |            |            |            |
|----|------------|------------|------------|
| Au | -8.0505919 | 2.5568744  | 4.7662524  |
| Au | -5.6379769 | 3.3407806  | 3.2943442  |
| Au | -6.5595138 | 0.5045814  | 3.2943442  |
| Au | -3.2864898 | 4.1048250  | 1.8300890  |
| Au | -5.1062149 | -1.4957129 | 1.8300890  |
| Au | -4.1407765 | 1.2864984  | 1.9276301  |
| Au | -0.8936307 | 4.8823121  | 0.3726132  |
| Au | -3.6273467 | -3.5312005 | 0.3726132  |
| Au | -2.6876301 | -0.7338524 | 0.4291147  |
| Au | -1.7776241 | 2.0668583  | 0.4291147  |
| Au | 1.5275964  | 5.6690164  | -1.0229837 |
| Au | -2.1309460 | -5.5908193 | -1.0229837 |

|    |            |            |            |
|----|------------|------------|------------|
| Au | -1.1987565 | -2.7911293 | -1.0095413 |
| Au | -0.2908066 | 0.0355672  | -1.0331888 |
| Au | 0.6361371  | 2.8560924  | -1.0095413 |
| Au | 3.9265018  | 6.4484680  | -2.4681673 |
| Au | -0.6483409 | -7.6314501 | -2.4681673 |
| Au | 0.3085544  | -4.8287911 | -2.3407775 |
| Au | 1.2024860  | -2.0028220 | -2.3856225 |
| Au | 2.1154276  | 0.8069235  | -2.3856225 |
| Au | 3.0532848  | 3.6186203  | -2.3407775 |
| Au | 1.5353388  | -6.7060892 | -4.0877714 |
| Au | 2.4509547  | -3.9442042 | -4.0877714 |
| Au | 3.3788618  | -1.1567802 | -4.0877714 |
| Au | 4.2665758  | 1.6437031  | -4.0877714 |
| Au | 5.1492223  | 4.4163006  | -4.0877714 |
| C  | 0.3860262  | -1.2190504 | 2.2024372  |
| C  | 1.4304731  | -1.6726946 | 1.3972865  |
| C  | 2.3935149  | -0.7757710 | 0.9354111  |
| C  | 2.3108844  | 0.5739303  | 1.2764233  |
| C  | 1.2623495  | 1.0273249  | 2.0766787  |
| C  | 0.3009070  | 0.1303319  | 2.5404828  |
| F  | -0.7065488 | 0.5627102  | 3.2740792  |
| F  | 1.1678602  | 2.3088453  | 2.3741759  |
| F  | 3.2098056  | 1.4245411  | 0.8220114  |
| F  | 3.3689423  | -1.1993468 | 0.1548439  |
| F  | 1.4949490  | -2.9445403 | 1.0562700  |
| F  | -0.5364333 | -2.0631498 | 2.6219239  |
